# Supplementary material for: BCR-ABL1 mediated miR-150 downregulation through MYC contributed to myeloid differentiation block and drug resistance in chronic myeloid leukemia
Source: PubMed Central journal article supplement — Haematologica. 2018 Jul 26;103(12):2016–25. doi: 10.3324/haematol.2018.193086 (PMC6269310; doi:10.3324/haematol.2018.193086), 2018-12
Supplement: 2018_193086-Disclosures_and_Contributions.pdf [file 2018_193086-Disclosures_and_Contributions.pdf]

Haematologica  
HAEMATOL/2018/193086  
Version 3

BCR-ABL1 mediated miR-150 downregulation through MYC  
contributed to myeloid differentiation block and drug resistance in  
chronic myeloid leukemia

Klara Srutova, Nikola Curik, Pavel Burda, Filipp Savvulidi, Giovannino  
Silvestri, Rossana Trotta, Hana Klamova, Pavla Pecherkova, Zofie  
Sovova, Jitka Koblihova, Tomas Stopka, Danilo Perrotti, and Katerina  
Machova Polakova

Disclosures: H.K. and K.M.P. were consultants for and received honoraria from Novartis, Bristol-Myers Squibb and Angelini. K.M.P. was consultant for and received honoraria from Incyte. Funding: This study was supported by the Ministry of Education Youth and Sports grant project MSMT LH15104, Charles University grant GAUK 178215, Czech Ministry of Health project no. 00023736 for the conceptual development of a research institute, Charles University Research Centers grant UNCE/MED/016 and program Progres Q26 and NCI-NIH grant CA163800.

Contributions: K.S. performed the majority of the experiments and contributed to data evaluation; N.C. wrote the manuscript, performed experiments, evaluated data and contributed to the interpretation of the results; P.B. performed experiments, analyzed data and revised the paper; F.S. performed FACS; G.S., R.T. and J.K. performed experiments; H.K. provided patient samples and clinical data; P.P. performed statistical evaluation/analysis of the data; Z.S. created schemes of the regulatory network; T.S. and D.P. helped with data interpretation and critically revised the manuscript; and K.M.P. coordinated and designed the research, interpreted the results, and revised the paper.
